# Supplementary material
Source: MDPI journal article supplement (https://www.mdpi.com/2077-1444/10/6/362)
Supplement: s1 [file s1]

## Supplementary File

### APPENDICES FOR CORRELATIONAL (QUANTITATIVE) ANALYSIS

#### 1. Appendix A. Variables for Competitiveness (Models 1 – 5)

Note: This appendix does not include the entire set of variables (>70) analysed at the beginning but the selected ones after the data treatment in steps 1 and 2 (as well as the subcategories that were significant statistically).

| Type of variable                | Category (prosperity theory associated) | Sub-category                                      | Variable                              | Code             | Source                                | Original value rank | Description (taken mostly literally from the original sources)                                                                                                                                                                                                                                                    |
|---------------------------------|-----------------------------------------|---------------------------------------------------|---------------------------------------|------------------|---------------------------------------|---------------------|-------------------------------------------------------------------------------------------------------------------------------------------------------------------------------------------------------------------------------------------------------------------------------------------------------------------|
| Predictor variables of interest | Religion                                | Religious denomination (proportion in population) | Roman Catholic                        | Catholics (%)    | (Johnson & Zurlò 2016)                | % 0-100             | Percentage of population in each country belonging to different religious affiliations.                                                                                                                                                                                                                           |
|                                 |                                         |                                                   | Protestant                            | Protestants (%)  |                                       | % 0-100             |                                                                                                                                                                                                                                                                                                                   |
|                                 |                                         |                                                   | Muslim                                | Muslims (%)      |                                       | % 0-100             |                                                                                                                                                                                                                                                                                                                   |
|                                 |                                         |                                                   | Orthodox                              | Orthodox (%)     |                                       | % 0-100             |                                                                                                                                                                                                                                                                                                                   |
|                                 |                                         |                                                   | Christianity: Other Adherents (%)     | Other Christians | (Teorell, et al. 2017)                | % 0-100             |                                                                                                                                                                                                                                                                                                                   |
|                                 |                                         | Societal religious norms                          | Global Restrictions on religion (GRI) | Restrictions     | (Pew Global Religions Diversity 2014) | 0-10                | The GRI is a fine-grained measure created by adding the 20 items on a 0-to-10 metric, with zero indicating very low levels of government restrictions on religion and 10 indicating extremely high levels of restrictions. (Pew Research Center, January 2014, 'Religious Hostilities Reach Six-Year High')       |
|                                 |                                         |                                                   | Social Hostilities (due to religion)  | Hostilities      |                                       | 0-10                | The Social Hostilities Index (SHI) measures acts of religious hostility by private individuals, organisations or groups in society. This includes religion-related armed conflict or terrorism, mob or sectarian violence, harassment over attire for religious reasons or other religion-related intimidation or |

## Appendix A. Variables for Competitiveness (Models 1 – 5)

| Type of variable                | Category (prosperity theory associated) | Sub-category | Variable                            | Code         | Source                        | Original value rank | Description (taken mostly literally from the original sources)                                                                                                                                                                                                                                                                                                                                                                                                                                                                                                                                                                                                                                                                                                                   |
|---------------------------------|-----------------------------------------|--------------|-------------------------------------|--------------|-------------------------------|---------------------|----------------------------------------------------------------------------------------------------------------------------------------------------------------------------------------------------------------------------------------------------------------------------------------------------------------------------------------------------------------------------------------------------------------------------------------------------------------------------------------------------------------------------------------------------------------------------------------------------------------------------------------------------------------------------------------------------------------------------------------------------------------------------------|
| Predictor variables of interest |                                         |              |                                     |              |                               |                     | abuse. (Pew Research Center, January 2014, 'Religious Hostilities Reach Six-Year High')                                                                                                                                                                                                                                                                                                                                                                                                                                                                                                                                                                                                                                                                                          |
|                                 |                                         |              | Interference of Religious Dogmas    | Dogmas       | (Teorell, <i>et al.</i> 2017) | 1, - 10             | The extent to what legal order and political institutions are defined without interference by religious dogmas? 1-10.<br>1. The state is theocratic. Religious dogmas define legal order and political institutions.<br>4. Secular and religious norms conflict with the basic constitution of the state or are forming a hybrid system.<br>7. The state is largely secular. However, religious dogmas have considerable influence on legal order and political institutions.<br>10. The state is secular. Religious dogmas have no noteworthy influence on legal order or political institutions.<br>Bertelsmann Stiftung <a href="http://www.bti-project.org/index/">http://www.bti-project.org/index/</a> (Bertelsmann Stiftung, 2016), cited in Teorell, et al. 2017 p. 114) |
|                                 |                                         |              | Freedom of Religion in Constitution | Constitution |                               | 1,2,96              | Does the constitution provide for freedom of religion?<br>1. Yes<br>2. No<br>96. Other<br>The Comparative Constitutions Project<br><a href="http://comparativeconstitutionsproject.org/">http://comparativeconstitutionsproject.org/</a> (Elkins et al., 2014, cited in Teorell, et al. 2017 p. 122)                                                                                                                                                                                                                                                                                                                                                                                                                                                                             |
|                                 |                                         |              | Conflict intensity                  | Conflict     |                               | 1, - 10             | How serious are social, ethnic and religious conflicts? 1-10.<br>1. There are no violent incidents based on social, ethnic or religious differences.<br>4. There are only a few violent incidents. Radical political actors have limited success in mobilising along existing cleavages. Society and the political elite, however, are divided along social, ethnic or religious lines.                                                                                                                                                                                                                                                                                                                                                                                          |

## Appendix A. Variables for Competitiveness (Models 1 – 5)

| Type of variable                | Category (prosperity theory associated) | Sub-category   | Variable               | Code             | Source                                  | Original value rank | Description (taken mostly literally from the original sources)                                                                                                                                                                                                                                                                                                                                                                                                                                                                                                                                                                                                                                                                                                                                                                                                                                                                 |
|---------------------------------|-----------------------------------------|----------------|------------------------|------------------|-----------------------------------------|---------------------|--------------------------------------------------------------------------------------------------------------------------------------------------------------------------------------------------------------------------------------------------------------------------------------------------------------------------------------------------------------------------------------------------------------------------------------------------------------------------------------------------------------------------------------------------------------------------------------------------------------------------------------------------------------------------------------------------------------------------------------------------------------------------------------------------------------------------------------------------------------------------------------------------------------------------------|
| Predictor variables of interest |                                         |                |                        |                  |                                         |                     | <p>7. There are violent incidents. Mobilized groups and protest movements dominate politics. Society and the political elite are deeply split into social classes, ethnic or religious communities.</p> <p>10. There is civil war or a widespread violent conflict based on social, ethnic or religious differences. Bertelsmann Stiftung <a href="http://www.bti-project.org/index/">http://www.bti-project.org/index/</a> (Bertelsmann Stiftung, 2016, cited in Teorell, et al. 2017 p. 107)</p>                                                                                                                                                                                                                                                                                                                                                                                                                             |
|                                 | Institutions                            | State religion | Muslim                 | MUSLIM (S.R)     | (Barro, R. J. and McCleary, R. M. 2005) | 0,1                 | State monopoly over religion has probably been the single most important form of state monopoly in existence. The choice of a state religion is a political calculus that involves interactions between the government and the religion sector (Barro, R. J. and McCleary, R. M. 2005). The key aspect of a state religion is its promotion of the monopoly position of the favoured religion, partly through limitations on entry and partly through subsidies (Smith [1791, Book V, Article III], cited in Barro, R. J. and McCleary, R. M. 2005). They categorise official state religion as an all-or-nothing choice. The data is taken for the year 2000. This variable can also be part of the societal religious norms subcategory and along with Christian denomination, being part of the predictor variable of interest. However, for practical reasons, this variable appears only here in category 'institutions'. |
|                                 |                                         |                | Catholic               | CATHOLIC (S.R)   |                                         | 0,1                 |                                                                                                                                                                                                                                                                                                                                                                                                                                                                                                                                                                                                                                                                                                                                                                                                                                                                                                                                |
|                                 |                                         |                | Protestant             | PROTESTANT (S.R) |                                         | 0,1                 |                                                                                                                                                                                                                                                                                                                                                                                                                                                                                                                                                                                                                                                                                                                                                                                                                                                                                                                                |
|                                 |                                         | Legal origin   | English Common Law     | ENGLISH (L.O.)   | (La Porta, <i>et al.</i> 1999)          | 0,1                 | It identifies the legal origin of the Company Law or Commercial Code of each country. There are five possible origins: (1) English Common Law; (2) French Commercial Code; (3) German Commercial Code; (4) Scandinavian Commercial Code; and (5) Socialist/Communist laws. These traditions were developed in England, France, Germany, Scandinavia,                                                                                                                                                                                                                                                                                                                                                                                                                                                                                                                                                                           |
|                                 |                                         |                | French Commercial Code | FRENCH (L.O.)    |                                         | 0,1                 |                                                                                                                                                                                                                                                                                                                                                                                                                                                                                                                                                                                                                                                                                                                                                                                                                                                                                                                                |

## Appendix A. Variables for Competitiveness (Models 1 – 5)

| Type of variable          | Category (prosperity theory associated)     | Sub-category                     | Variable                      | Code                 | Source                        | Original value rank | Description (taken mostly literally from the original sources)                                                                                                                                                                                                                                                                          |
|---------------------------|---------------------------------------------|----------------------------------|-------------------------------|----------------------|-------------------------------|---------------------|-----------------------------------------------------------------------------------------------------------------------------------------------------------------------------------------------------------------------------------------------------------------------------------------------------------------------------------------|
|                           |                                             |                                  | Socialist/Communist Laws      | SOCIALIST (L.O.)     |                               | 0,1                 | and the Soviet Union but then spread through the world through conquest, colonisation, imitation, and voluntary adoption. Source: (La Porta et al. 1998, 1999)                                                                                                                                                                          |
|                           |                                             |                                  | German Commercial Code        | GERMAN (L.O.)        |                               | 0,1                 |                                                                                                                                                                                                                                                                                                                                         |
|                           |                                             |                                  | Scandinavian Commercial Code  | SCANDINAVIA N (L.O.) |                               | 0,1                 |                                                                                                                                                                                                                                                                                                                                         |
| Other Predictor variables | Environment and geography                   |                                  | Latitude (average)            | Latitude             | (Teorell, <i>et al.</i> 2017) | 0-1                 | The absolute value of the latitude of the capital city, divided by 90 (to take values between 0 and 1). P. 446                                                                                                                                                                                                                          |
|                           |                                             |                                  | Environment Performance Index | EPI                  | (Hsu, <i>et al.</i> 2016)     | 0-100               | The Environmental Performance Index (EPI) ranks countries' performance on high-priority environmental issues in two areas: protection of human health and protection of ecosystems. Within these two policy objectives, the EPI scores national performance in nine issue areas comprised of more than 20 indicators (Hsu, et al. 2016) |
|                           | Cultural determinants (other than religion) | Main Languages fractionalisation | English                       | English (lang)       | (CIA 2016)                    | % 0-100             | The share of main native speakers in the population                                                                                                                                                                                                                                                                                     |
|                           |                                             |                                  | French                        | French (lang)        |                               | % 0-100             |                                                                                                                                                                                                                                                                                                                                         |
|                           |                                             |                                  | Spanish                       | Spanish (lang)       |                               | % 0-100             |                                                                                                                                                                                                                                                                                                                                         |
|                           |                                             |                                  | Russian                       | Russian (lang)       |                               | % 0-100             |                                                                                                                                                                                                                                                                                                                                         |
|                           |                                             |                                  | German                        | German (lang)        |                               | % 0-100             |                                                                                                                                                                                                                                                                                                                                         |
|                           | Portuguese                                  | Portug. (lang)                   | % 0-100                       |                      |                               |                     |                                                                                                                                                                                                                                                                                                                                         |

## Appendix A. Variables for Competitiveness (Models 1 – 5)

| Type of variable          | Category (prosperity theory associated) | Sub-category                    | Variable                           | Code             | Source                      | Original value rank | Description (taken mostly literally from the original sources)                                                                                                                                                                                                                                                                                                                                                                                                                                                                                                                                                                                                                                                                                                                                                                  |
|---------------------------|-----------------------------------------|---------------------------------|------------------------------------|------------------|-----------------------------|---------------------|---------------------------------------------------------------------------------------------------------------------------------------------------------------------------------------------------------------------------------------------------------------------------------------------------------------------------------------------------------------------------------------------------------------------------------------------------------------------------------------------------------------------------------------------------------------------------------------------------------------------------------------------------------------------------------------------------------------------------------------------------------------------------------------------------------------------------------|
| Other Predictor variables |                                         |                                 | Italian                            | Italian (lang)   |                             | % 0-100             | The proportion of ethnicities in population                                                                                                                                                                                                                                                                                                                                                                                                                                                                                                                                                                                                                                                                                                                                                                                     |
|                           |                                         | Main Ethnical fractionalisation | Caucasian                          | Caucasian (ethn) |                             | % 0-100             |                                                                                                                                                                                                                                                                                                                                                                                                                                                                                                                                                                                                                                                                                                                                                                                                                                 |
|                           |                                         |                                 | Latino                             | Latino (ethn)    |                             | % 0-100             |                                                                                                                                                                                                                                                                                                                                                                                                                                                                                                                                                                                                                                                                                                                                                                                                                                 |
|                           |                                         |                                 | African                            | African (ethn)   |                             | % 0-100             |                                                                                                                                                                                                                                                                                                                                                                                                                                                                                                                                                                                                                                                                                                                                                                                                                                 |
|                           |                                         |                                 | Amerindian                         | Amerind. (ethn)  |                             | % 0-100             |                                                                                                                                                                                                                                                                                                                                                                                                                                                                                                                                                                                                                                                                                                                                                                                                                                 |
|                           |                                         |                                 | Mestizo                            | Mestizo (ethn)   |                             | % 0-100             |                                                                                                                                                                                                                                                                                                                                                                                                                                                                                                                                                                                                                                                                                                                                                                                                                                 |
|                           |                                         |                                 | Mulatto                            | Mulatto (ethn)   |                             | % 0-100             |                                                                                                                                                                                                                                                                                                                                                                                                                                                                                                                                                                                                                                                                                                                                                                                                                                 |
|                           |                                         |                                 | Asian                              | Asian (ethn)     |                             | % 0-100             |                                                                                                                                                                                                                                                                                                                                                                                                                                                                                                                                                                                                                                                                                                                                                                                                                                 |
| Criterion Variable        | Prosperity                              |                                 | Global Competitiveness Index (GCI) | Competitiveness  | (World Economic Forum 2016) | (1–7)               | Competitiveness is defined as the set of institutions, policies and factors that determine a country's level of productivity. The level of productivity, in turn, sets the level of prosperity that can be reached by an economy. The Global Competitiveness Index (GCI) is a comprehensive framework that measures the microeconomic and macroeconomic foundations of national competitiveness, grouped into 12 categories' (World Economic Forum 2016). The twelve categories that comprise this index are institutions, technological readiness, innovation, higher education and training, health and primary education, business sophistication, infrastructure, macroeconomic environment, labour market efficiency, market size, financial market development, and goods market efficiency. (World Economic Forum 2016). |

## 2. Appendix B. Countries of Analysis and Data for the Most Significant Variables

|                      |           |      | Predictor variables (x) / Causal Conditions: Theories of prosperity                                                                  |          |          |        |       |          |         |                                                                |                                     | Criterion variables (y) / Outcome: |                                                          |                                                                     |
|----------------------|-----------|------|--------------------------------------------------------------------------------------------------------------------------------------|----------|----------|--------|-------|----------|---------|----------------------------------------------------------------|-------------------------------------|------------------------------------|----------------------------------------------------------|---------------------------------------------------------------------|
|                      |           |      | Percentage of population in each country belonging to main religious affiliations in Europe and the Americas (Johnson & Zurlo 2016). |          |          |        |       |          |         | State religion in 2000 (Barro, R. J. and McCleary, R. M. 2005) | Legal Origin (La Porta et al. 1999) | EPI (Hsu, et al. 2016)             | Global Competitiveness Index (World Economic Forum 2016) | Corruption Perception Index (CPI) (Transparency International 2016) |
| Countries            | Continent | Code | Protestant                                                                                                                           | Catholic | Orthodox | Muslim | Indep | Agnostic | Atheist |                                                                |                                     |                                    |                                                          |                                                                     |
| Albania              | EUROPE    | ALB  | 0%                                                                                                                                   | 18%      | 18%      | 61%    | 2%    | 2%       | 0%      | Muslim                                                         | Socialist                           | 74.38                              | 4.06                                                     | 39                                                                  |
| Belarus              | EUROPE    | BLR  | 3%                                                                                                                                   | 11%      | 58%      | 0%     | 2%    | 20%      | 3%      | none                                                           | Socialist                           | 82.3                               | No data*                                                 | 40                                                                  |
| Moldova, Republic of | EUROPE    | MDA  | 2%                                                                                                                                   | 0%       | 94%      | 0%     | 1%    | 2%       | 0%      | none                                                           | Socialist                           | 76.69                              |                                                          | 3.86                                                                |
| Austria              | EUROPE    | AUT  | 5%                                                                                                                                   | 64%      | 3%       | 6%     | 1%    | 16%      | 2%      | none                                                           | German                              | 86.64                              | 5.22                                                     | 75                                                                  |
| Belgium              | EUROPE    | BEL  | 1%                                                                                                                                   | 65%      | 1%       | 6%     | 1%    | 23%      | 2%      | none                                                           | French                              | 80.15                              | 5.25                                                     | 77                                                                  |
| Bulgaria             | EUROPE    | BGR  | 2%                                                                                                                                   | 1%       | 82%      | 12%    | 1%    | 3%       | 1%      | none                                                           | Socialist                           | 83.4                               | 4.44                                                     | 41                                                                  |
| Croatia              | EUROPE    | HRV  | 1%                                                                                                                                   | 84%      | 5%       | 2%     | 1%    | 3%       | 1%      | Catholic                                                       | Socialist                           | 86.98                              | 4.15                                                     | 49                                                                  |
| Czech Republic       | EUROPE    | CZE  | 2%                                                                                                                                   | 29%      | 0%       | 0%     | 3%    | 41%      | 5%      | none                                                           | Socialist                           | 84.67                              | 4.72                                                     | 55                                                                  |
| Denmark              | EUROPE    | DNK  | 80%                                                                                                                                  | 1%       | 0%       | 5%     | 1%    | 11%      | 2%      | Protestant                                                     | Scandinavian                        | 89.21                              | 5.35                                                     | 90                                                                  |

## Appendix B. Countries of Analysis and Data for the Most Significant Variables

|                                            |           |      | Predictor variables (x) / Causal Conditions: Theories of prosperity                                                                  |          |          |        |       |          |         |                                                                |                                     | Criterion variables (y) / Outcome: |                                                          |                                                                     |
|--------------------------------------------|-----------|------|--------------------------------------------------------------------------------------------------------------------------------------|----------|----------|--------|-------|----------|---------|----------------------------------------------------------------|-------------------------------------|------------------------------------|----------------------------------------------------------|---------------------------------------------------------------------|
|                                            |           |      | Percentage of population in each country belonging to main religious affiliations in Europe and the Americas (Johnson & Zurlo 2016). |          |          |        |       |          |         | State religion in 2000 (Barro, R. J. and McCleary, R. M. 2005) | Legal Origin (La Porta et al. 1999) | EPI (Hsu, et al. 2016)             | Global Competitiveness Index (World Economic Forum 2016) | Corruption Perception Index (CPI) (Transparency International 2016) |
| Countries                                  | Continent | Code | Protestant                                                                                                                           | Catholic | Orthodox | Muslim | Indep | Agnostic | Atheist |                                                                |                                     |                                    |                                                          |                                                                     |
| Estonia                                    | EUROPE    | EST  | 19%                                                                                                                                  | 1%       | 13%      | 0%     | 5%    | 51%      | 4%      | none                                                           | Socialist                           | 88.59                              | 4.78                                                     | 70                                                                  |
| Finland                                    | EUROPE    | FIN  | 74%                                                                                                                                  | 0%       | 1%       | 1%     | 1%    | 17%      | 2%      | Protestant                                                     | Scandinavian                        | 90.68                              | 5.44                                                     | 89                                                                  |
| France                                     | EUROPE    | FRA  | 2%                                                                                                                                   | 59%      | 1%       | 9%     | 3%    | 20%      | 4%      | none                                                           | French                              | 88.2                               | 5.20                                                     | 69                                                                  |
| Germany                                    | EUROPE    | DEU  | 32%                                                                                                                                  | 30%      | 2%       | 5%     | 1%    | 24%      | 3%      | none                                                           | German                              | 84.26                              | 5.57                                                     | 81                                                                  |
| Greece                                     | EUROPE    | GR C | 0%                                                                                                                                   | 1%       | 89%      | 5%     | 1%    | 4%       | 0%      | none                                                           | French                              | 85.81                              | 4.00                                                     | 44                                                                  |
| Hungary                                    | EUROPE    | HUN  | 25%                                                                                                                                  | 59%      | 2%       | 0%     | 2%    | 8%       | 4%      | none                                                           | Socialist                           | 84.6                               | 4.20                                                     | 48                                                                  |
| Ireland                                    | EUROPE    | IRL  | 3%                                                                                                                                   | 76%      | 0%       | 1%     | 1%    | 6%       | 0%      | Catholic                                                       | English                             | 86.6                               | 5.18                                                     | 73                                                                  |
| Italy                                      | EUROPE    | ITA  | 0%                                                                                                                                   | 78%      | 0%       | 3%     | 2%    | 13%      | 4%      | Catholic                                                       | French                              | 84.48                              | 4.50                                                     | 47                                                                  |
| Latvia                                     | EUROPE    | LVA  | 16%                                                                                                                                  | 21%      | 40%      | 0%     | 1%    | 19%      | 4%      | none                                                           | Socialist                           | 85.71                              | 4.45                                                     | 57                                                                  |
| Lithuania                                  | EUROPE    | LTU  | 1%                                                                                                                                   | 79%      | 5%       | 0%     | 1%    | 10%      | 1%      | Catholic                                                       | Socialist                           | 85.49                              | 4.60                                                     | 59                                                                  |
| Macedonia, the Former Yugoslav Republic of | EUROPE    | MKD  | 1%                                                                                                                                   | 1%       | 63%      | 33%    | 1%    | 3%       | 0%      | none                                                           | Socialist                           | 78.02                              | 4.23                                                     | 37                                                                  |
| Norway                                     |           | NOR  | 84%                                                                                                                                  | 2%       | 0%       | 3%     | 1%    | 7%       | 1%      | Protestant                                                     | Scandinavian                        | 86.9                               | 5.44                                                     | 85                                                                  |
| Poland                                     | EUROPE    | POL  | 0%                                                                                                                                   | 89%      | 1%       | 0%     | 1%    | 4%       | 0%      | none                                                           | Socialist                           | 81.26                              | 4.56                                                     | 62                                                                  |

## Appendix B. Countries of Analysis and Data for the Most Significant Variables

|                        |           |      | Predictor variables (x) / Causal Conditions: Theories of prosperity                                                                  |          |          |        |       |          |         |                                                                |                                     |                        | Criterion variables (y) / Outcome:                       |                                                                     |
|------------------------|-----------|------|--------------------------------------------------------------------------------------------------------------------------------------|----------|----------|--------|-------|----------|---------|----------------------------------------------------------------|-------------------------------------|------------------------|----------------------------------------------------------|---------------------------------------------------------------------|
|                        |           |      | Percentage of population in each country belonging to main religious affiliations in Europe and the Americas (Johnson & Zurlo 2016). |          |          |        |       |          |         | State religion in 2000 (Barro, R. J. and McCleary, R. M. 2005) | Legal Origin (La Porta et al. 1999) | EPI (Hsu, et al. 2016) | Global Competitiveness Index (World Economic Forum 2016) | Corruption Perception Index (CPI) (Transparency International 2016) |
| Countries              | Continent | Code | Protestant                                                                                                                           | Catholic | Orthodox | Muslim | Indep | Agnostic | Atheist |                                                                |                                     |                        |                                                          |                                                                     |
| Portugal               | EUROPE    | PRT  | 1%                                                                                                                                   | 86%      | 0%       | 0%     | 4%    | 6%       | 1%      | Catholic                                                       | French                              | 88.63                  | 4.48                                                     | 62                                                                  |
| Russian Federation     | EUROPE    | RUS  | 1%                                                                                                                                   | 1%       | 79%      | 12%    | 2%    | 4%       | 1%      | none                                                           | Socialist                           | 83.52                  | 4.51                                                     | 29                                                                  |
| Slovakia               | EUROPE    | SVK  | 9%                                                                                                                                   | 75%      | 1%       | 0%     | 1%    | 11%      | 3%      | none                                                           | Socialist                           | 85.42                  | 4.28                                                     | 51                                                                  |
| Slovenia               | EUROPE    | SVN  | 2%                                                                                                                                   | 77%      | 4%       | 2%     | 1%    | 8%       | 2%      | Catholic                                                       | Socialist                           | 88.98                  | 4.39                                                     | 61                                                                  |
| Spain                  | EUROPE    | ESP  | 0%                                                                                                                                   | 87%      | 0%       | 3%     | 1%    | 8%       | 2%      | Catholic                                                       | French                              | 88.91                  | 4.68                                                     | 58                                                                  |
| Sweden                 | EUROPE    | SWE  | 58%                                                                                                                                  | 2%       | 1%       | 6%     | 1%    | 20%      | 11%     | Protestant                                                     | Scandinavian                        | 90.43                  | 5.53                                                     | 88                                                                  |
| Switzerland            | EUROPE    | CHE  | 30%                                                                                                                                  | 43%      | 2%       | 6%     | 3%    | 14%      | 1%      | none                                                           | German                              | 86.93                  | 5.81                                                     | 86                                                                  |
| Ukraine                | EUROPE    | UKR  | 2%                                                                                                                                   | 11%      | 71%      | 2%     | 3%    | 10%      | 2%      | none                                                           | Socialist                           | 79.69                  | 4.00                                                     | 29                                                                  |
| Bosnia and Herzegovina | EUROPE    | BIH  | 0%                                                                                                                                   | 12%      | 37%      | 48%    | 0%    | 3%       | 1%      | none                                                           | Socialist                           | 63.28                  | 3.80                                                     | 39                                                                  |
| Iceland                | EUROPE    | ISL  | 79%                                                                                                                                  | 4%       | 0%       | 0%     | 7%    | 4%       | 0%      | Protestant                                                     | Scandinavian                        | 90.51                  | 4.96                                                     | 78                                                                  |
| Netherlands            | EUROPE    | NLD  | 17%                                                                                                                                  | 26%      | 0%       | 6%     | 3%    | 29%      | 2%      | none                                                           | French                              | 82.03                  | 5.57                                                     | 83                                                                  |
| United Kingdom         | EUROPE    | GBR  | 45%                                                                                                                                  | 9%       | 1%       | 4%     | 5%    | 20%      | 1%      | Protestant                                                     | English                             | 87.38                  | 5.49                                                     | 81                                                                  |
| Luxembourg             | EUROPE    | LUX  | 2%                                                                                                                                   | 77%      | 0%       | 2%     | 1%    | 16%      | 2%      | Catholic                                                       | French                              | 86.58                  | 5.20                                                     | 81                                                                  |



## Appendix B. Countries of Analysis and Data for the Most Significant Variables

|                    |           |      | Predictor variables (x) / Causal Conditions: Theories of prosperity                                                                  |          |          |        |       |          |         |                                                                |                                     |                        | Criterion variables (y) / Outcome:                       |                                                                     |
|--------------------|-----------|------|--------------------------------------------------------------------------------------------------------------------------------------|----------|----------|--------|-------|----------|---------|----------------------------------------------------------------|-------------------------------------|------------------------|----------------------------------------------------------|---------------------------------------------------------------------|
|                    |           |      | Percentage of population in each country belonging to main religious affiliations in Europe and the Americas (Johnson & Zurlo 2016). |          |          |        |       |          |         | State religion in 2000 (Barro, R. J. and McCleary, R. M. 2005) | Legal Origin (La Porta et al. 1999) | EPI (Hsu, et al. 2016) | Global Competitiveness Index (World Economic Forum 2016) | Corruption Perception Index (CPI) (Transparency International 2016) |
| Countries          | Continent | Code | Protestant                                                                                                                           | Catholic | Orthodox | Muslim | Indep | Agnostic | Atheist |                                                                |                                     |                        |                                                          |                                                                     |
| Montenegro         | EUROPE    | MNE  | 3%                                                                                                                                   | 3%       | 71%      | 17%    | 2%    | 4%       | 1%      | none                                                           | none                                | 78.89                  | 4.05                                                     | 45                                                                  |
| Serbia             | EUROPE    | SRB  | 1%                                                                                                                                   | 6%       | 84%      | 7%     | 2%    | 3%       | 1%      | none                                                           | none                                | 78.67                  | 3.97                                                     | 42                                                                  |
| Romania            | EUROPE    | ROU  | 10%                                                                                                                                  | 9%       | 93%      | 0%     | 1%    | 1%       | 0%      | none                                                           | Socialist                           | 83.24                  | 4.30                                                     | 48                                                                  |
| Malta              | EUROPE    | MLT  | 0%                                                                                                                                   | 92%      | 0%       | 0%     | 1%    | 2%       | 0%      | Catholic                                                       | French                              | 88.48                  | 4.52                                                     | 55                                                                  |
| Dominican Republic | NORTH AM  | DOM  | 11%                                                                                                                                  | 81%      | 0%       | 0%     | 5%    | 2%       | 0%      | Catholic                                                       | French                              | 75.32                  | 3.94                                                     | 31                                                                  |
| Honduras           | NORTH AM  | HND  | 18%                                                                                                                                  | 74%      | 0%       | 0%     | 8%    | 2%       | 0%      | Catholic                                                       | French                              | 69.64                  | 3.98                                                     | 30                                                                  |
| Mexico             | NORTH AM  | MEX  | 4%                                                                                                                                   | 88%      | 0%       | 0%     | 6%    | 3%       | 0%      | none                                                           | French                              | 73.59                  | 4.41                                                     | 30                                                                  |
| Costa Rica         | NORTH AM  | CRI  | 11%                                                                                                                                  | 83%      | 0%       | 0%     | 8%    | 3%       | 0%      | Catholic                                                       | French                              | 80.03                  | 4.41                                                     | 58                                                                  |
| El Salvador        | NORTH AM  | SLV  | 17%                                                                                                                                  | 76%      | 0%       | 0%     | 21%   | 2%       | 0%      | Catholic                                                       | French                              | 68.07                  | 3.81                                                     | 36                                                                  |
| Guatemala          | NORTH AM  | GTM  | 15%                                                                                                                                  | 83%      | 1%       | 0%     | 12%   | 1%       | 0%      | Catholic                                                       | French                              | 69.64                  | 4.08                                                     | 28                                                                  |
| Jamaica            | NORTH AM  | JAM  | 40%                                                                                                                                  | 2%       | 0%       | 0%     | 12%   | 4%       | 0%      | none                                                           | English                             | 77.02                  | 4.13                                                     | 39                                                                  |
| Canada             | NORTH AM  | CAN  | 11%                                                                                                                                  | 42%      | 3%       | 3%     | 4%    | 18%      | 3%      | none                                                           | English                             | 85.06                  | 5.27                                                     | 82                                                                  |
| Nicaragua          | NORTH AM  | NIC  | 23%                                                                                                                                  | 86%      | 0%       | 0%     | 10%   | 3%       | 0%      | none                                                           | French                              | 64.19                  | 3.81                                                     | 26                                                                  |

## Appendix B. Countries of Analysis and Data for the Most Significant Variables

|                     |           |      | Predictor variables (x) / Causal Conditions: Theories of prosperity                                                                  |          |          |        |             |          |         |                                                                |                                     |                        | Criterion variables (y) / Outcome:                       |                                                                     |
|---------------------|-----------|------|--------------------------------------------------------------------------------------------------------------------------------------|----------|----------|--------|-------------|----------|---------|----------------------------------------------------------------|-------------------------------------|------------------------|----------------------------------------------------------|---------------------------------------------------------------------|
|                     |           |      | Percentage of population in each country belonging to main religious affiliations in Europe and the Americas (Johnson & Zurlo 2016). |          |          |        |             |          |         | State religion in 2000 (Barro, R. J. and McCleary, R. M. 2005) | Legal Origin (La Porta et al. 1999) | EPI (Hsu, et al. 2016) | Global Competitiveness Index (World Economic Forum 2016) | Corruption Perception Index (CPI) (Transparency International 2016) |
| Countries           | Continent | Code | Protestant                                                                                                                           | Catholic | Orthodox | Muslim | Independent | Agnostic | Atheist |                                                                |                                     |                        |                                                          |                                                                     |
| Panama              | NORTH AM  | PAN  | 15%                                                                                                                                  | 69%      | 0%       | 1%     | 6%          | 4%       | 1%      | Catholic                                                       | French                              | 78                     | 4.51                                                     | 38                                                                  |
| Trinidad and Tobago | NORTH AM  | TTO  | 28%                                                                                                                                  | 28%      | 1%       | 6%     | 6%          | 2%       | 0%      | none                                                           | English                             | 74.34                  | 3.93                                                     | 35                                                                  |
| United States       | NORTH AM  | USA  | 18%                                                                                                                                  | 23%      | 2%       | 1%     | 22%         | 15%      | 1%      | none                                                           | English                             | 84.72                  | 5.70                                                     | 74                                                                  |
| Haiti               | NORTH AM  | HTI  | 22%                                                                                                                                  | 66%      | 0%       | 0%     | 6%          | 3%       | 0%      | Catholic                                                       | French                              | 43.28                  | No data*                                                 | 20                                                                  |
| Cuba                | NORTH AM  | CUB  | 4%                                                                                                                                   | 53%      | 0%       | 0%     | 4%          | 17%      | 4%      | Catholic                                                       | Socialist                           | 79.04                  | No data*                                                 | 47                                                                  |
| Brazil              | SOUTH AM  | BRA  | 17%                                                                                                                                  | 74%      | 0%       | 0%     | 12%         | 3%       | 0%      | Catholic                                                       | French                              | 78.9                   | 4.06                                                     | 40                                                                  |
| Colombia            | SOUTH AM  | COL  | 3%                                                                                                                                   | 88%      | 0%       | 0%     | 4%          | 2%       | 0%      | Catholic                                                       | French                              | 75.93                  | 4.30                                                     | 37                                                                  |
| Ecuador             | SOUTH AM  | ECU  | 4%                                                                                                                                   | 86%      | 0%       | 0%     | 5%          | 3%       | 0%      | none                                                           | French                              | 66.58                  | 3.96                                                     | 31                                                                  |
| Peru                | SOUTH AM  | PER  | 6%                                                                                                                                   | 87%      | 0%       | 0%     | 8%          | 1%       | 0%      | Catholic                                                       | French                              | 72.95                  | 4.23                                                     | 35                                                                  |
| Argentina           | SOUTH AM  | ARG  | 6%                                                                                                                                   | 82%      | 0%       | 2%     | 6%          | 5%       | 1%      | Catholic                                                       | French                              | 79.84                  | 3.81                                                     | 36                                                                  |
| Bolivia             | SOUTH AM  | BOL  | 11%                                                                                                                                  | 88%      | 0%       | 0%     | 6%          | 2%       | 0%      | Catholic                                                       | French                              | 71.09                  | 3.54                                                     | 33                                                                  |
| Paraguay            | SOUTH AM  | PRY  | 4%                                                                                                                                   | 89%      | 0%       | 0%     | 8%          | 2%       | 0%      | Catholic                                                       | French                              | 70.36                  | 3.65                                                     | 30                                                                  |

## Appendix B. Countries of Analysis and Data for the Most Significant Variables

|           |           |      | Predictor variables (x) / Causal Conditions: Theories of prosperity                                                                  |          |          |        |       |          |         |                                                                | Criterion variables (y) / Outcome:  |                        |                                                          |                                                                     |
|-----------|-----------|------|--------------------------------------------------------------------------------------------------------------------------------------|----------|----------|--------|-------|----------|---------|----------------------------------------------------------------|-------------------------------------|------------------------|----------------------------------------------------------|---------------------------------------------------------------------|
|           |           |      | Percentage of population in each country belonging to main religious affiliations in Europe and the Americas (Johnson & Zurlo 2016). |          |          |        |       |          |         | State religion in 2000 (Barro, R. J. and McCleary, R. M. 2005) | Legal Origin (La Porta et al. 1999) | EPI (Hsu, et al. 2016) | Global Competitiveness Index (World Economic Forum 2016) | Corruption Perception Index (CPI) (Transparency International 2016) |
| Countries | Continent | Code | Protestant                                                                                                                           | Catholic | Orthodox | Muslim | Indep | Agnostic | Atheist |                                                                |                                     |                        |                                                          |                                                                     |
| Uruguay   | SOUTH AM  | URY  | 3%                                                                                                                                   | 56%      | 1%       | 0%     | 7%    | 29%      | 7%      | none                                                           | French                              | 73.98                  | 4.17                                                     | 71                                                                  |
| Guyana    | SOUTH AM  | GUY  | 39%                                                                                                                                  | 8%       | 1%       | 8%     | 12%   | 2%       | 1%      | none                                                           | English                             | 71.14                  | No data*                                                 | 34                                                                  |
| Venezuela | SOUTH AM  | VEN  | 6%                                                                                                                                   | 83%      | 0%       | 0%     | 5%    | 4%       | 0%      | Catholic                                                       | French                              | 76.23                  | 3.27                                                     | 17                                                                  |
| Chile     | SOUTH AM  | CHL  | 3%                                                                                                                                   | 71%      | 2%       | 0%     | 29%   | 8%       | 2%      | Catholic                                                       | French                              | 77.67                  | 4.64                                                     | 66                                                                  |
| Suriname  | SOUTH AM  | SUR  | 17%                                                                                                                                  | 30%      | 0%       | 16%    | 3%    | 5%       | 0%      | none                                                           | French                              | 68.58                  | No data*                                                 | 45                                                                  |

Note: In the case of the competitiveness analysis (Models 1-5), observations marked with an asterisk (\*) were not included due to inexistent data
